# Supplementary material for: Effects of matrix stiffness on epithelial to mesenchymal transition-like processes of endometrial epithelial cells: Implications for the pathogenesis of endometriosis
Source: PubMed Central journal article supplement (PMC5356009; doi:10.1038/srep44616), 2017-03-17
Supplement: srep44616-s1.pdf [file srep44616-s1.pdf]

**Effects of matrix stiffness on epithelial to mesenchymal transition-like processes of endometrial epithelial cells: Implications for the pathogenesis of endometriosis**

Sachiko Matsuzaki 1, 2, 3\*

Claude Darcha 4

Jean-Luc Pouly 1

Michel Canis 1, 2, 3

1 CHU Clermont-Ferrand, CHU Estaing, Chirurgie Gynécologique, Clermont-Ferrand, France

2 Clermont Université, Université d'Auvergne, ISIT UMR6284, Clermont-Ferrand, France

3 CNRS, ISIT UMR6284, Clermont-Ferrand, France

4 CHU Clermont-Ferrand, Service d'Anatomie et Cytologie Pathologiques, Clermont-Ferrand, France

\*To whom correspondence should be addressed:

Sachiko Matsuzaki

CHU Clermont-Ferrand, CHU Estaing, Chirurgie Gynécologique, 1, Place Lucie et Raymond Aubrac,  
63003 Clermont-Ferrand, France, Tel: +33 4 73 75 01 38, E-mail: sachikoma@aol.com

# Supplementary Figure 1

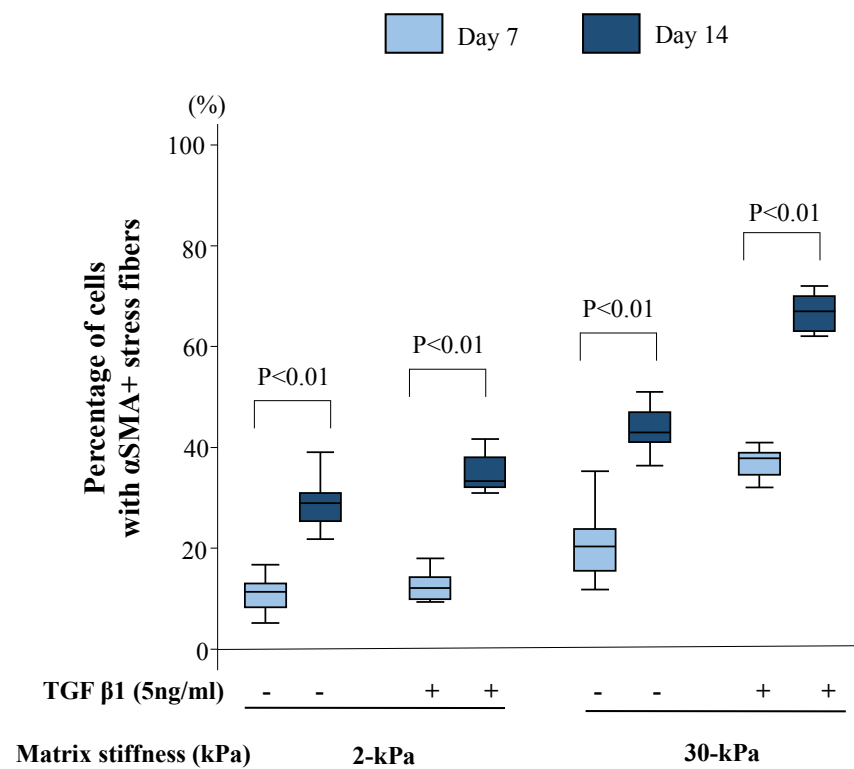

### **Supplementary Figure Legends**

**Supplementary Figure 1:** The percentage of cells with  $\alpha$ SMA+ stress fibers with or without TGF- $\beta$ 1 (5 ng/mL) stimulation in endometrial stromal cells of patients with endometriosis (EES) grown on 2- or 30-kPa PGS for 7 days or 14 days with or without TGF- $\beta$ 1 (5 ng/mL) stimulation.

**Supplementary Table 1. Clinical characteristics of patients**

|                             | With<br>Endometriosis | Without<br>endometriosis |
|-----------------------------|-----------------------|--------------------------|
| No of cases                 | 40                    | 5                        |
| Age <sup>a</sup>            | 31.0<br>(23-37)       | 30.0<br>(24-35)          |
| Parity <sup>a</sup>         | 0 (0-1)               | 0 (0-1)                  |
| rASRM<br>stage <sup>b</sup> |                       |                          |
| I                           | 18                    |                          |
| II                          | 12                    |                          |
| III                         | 4                     |                          |
| IV                          | 6                     |                          |

<sup>a</sup> Median (range)

<sup>b</sup> Revised American Society for Reproductive Medicine classification (rASRM) (American Society for Reproductive Medicine, 1997).

**Supplementary Table 2: The numbers of samples used for each experiment**

|                         | EEE | NEEE | DEE | EES | DIE | R-PE |
|-------------------------|-----|------|-----|-----|-----|------|
| CK & E-cadherin         | 10  | 5    | 5   |     |     |      |
| CK & N-cadherin         | 6   |      |     |     |     |      |
| CK & ZO-1               | 6   |      |     |     |     |      |
| CK & F-actin            | 6   |      |     |     |     |      |
| E-cadherin & p-Smad 2/3 |     |      |     |     | 5   | 5    |
| CK & Ki67               | 8   |      |     |     |     |      |
| Annexin V staining      | 8   |      |     |     |     |      |
| $\alpha$ SMA & Col-I    |     |      |     | 8   |     |      |

EEE: endometrial epithelial cells of patients with endometriosis

NEEE: endometrial epithelial cells of patients without endometriosis

DEE: deep infiltrating endometriotic epithelial cells

EES: endometrial stromal cells of patients with endometriosis

DIE: deep infiltrating endometriotic tissues

R-PE: red peritoneal endometriotic tissues

CK: cytokeratin

ZO-1: zonula occludens 1

p-Smad 2/3: phosphorylated Smad 2/3

$\alpha$ SMA:  $\alpha$ -smooth muscle actin

Col-I: collagen I
